# Supplementary material
Source: publisher site journal article supplement (https://www.dovepress.com/get_supplementary_file.php?f=508946.docx)
Supplement: Supplementary file 1 [file get_supplementary_file.php]

**Supplementary Figures and Tables**

**
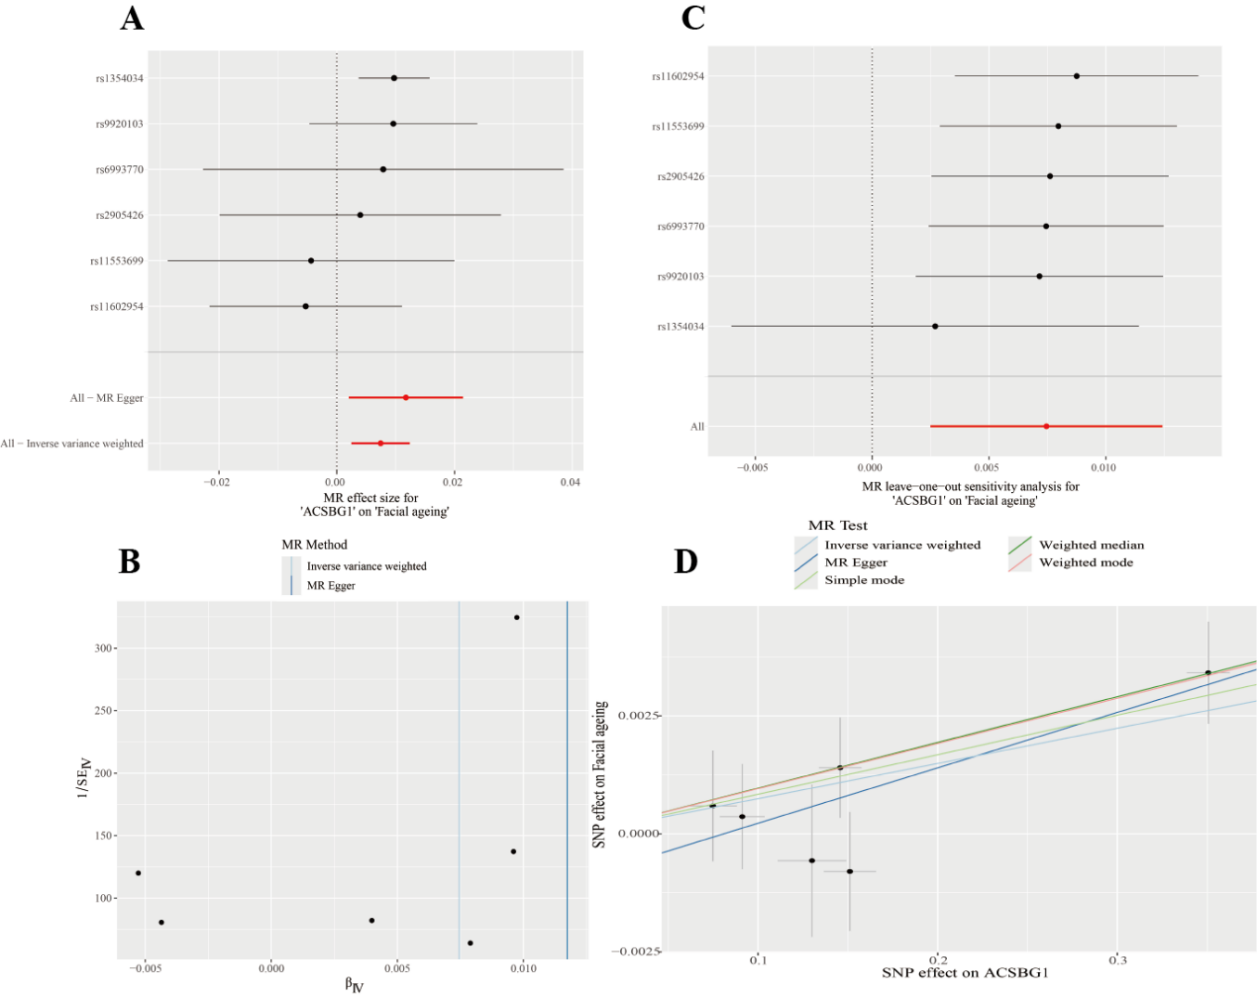
**

**Supplementary Figure 1：**Association Between SG and ACSBG1 Estimated by the MR. **(A)** Forest plot of ACSBG1 for each 1 SD increase of SG risk. **(B)** The funnel plot showed no asymmetry **(C)**There was no substantial change of IVW causal estimate after removing any of the instrumental SNPs. **(D)** Scatter plot showing the effect of genetic instruments on SG risk against their effect on ACSBG1. (SG = Skin aging; IVW = inverse variance weighted; MR = Mendelian randomization; MR-Egger=Mendelian randomization-Egger)

**
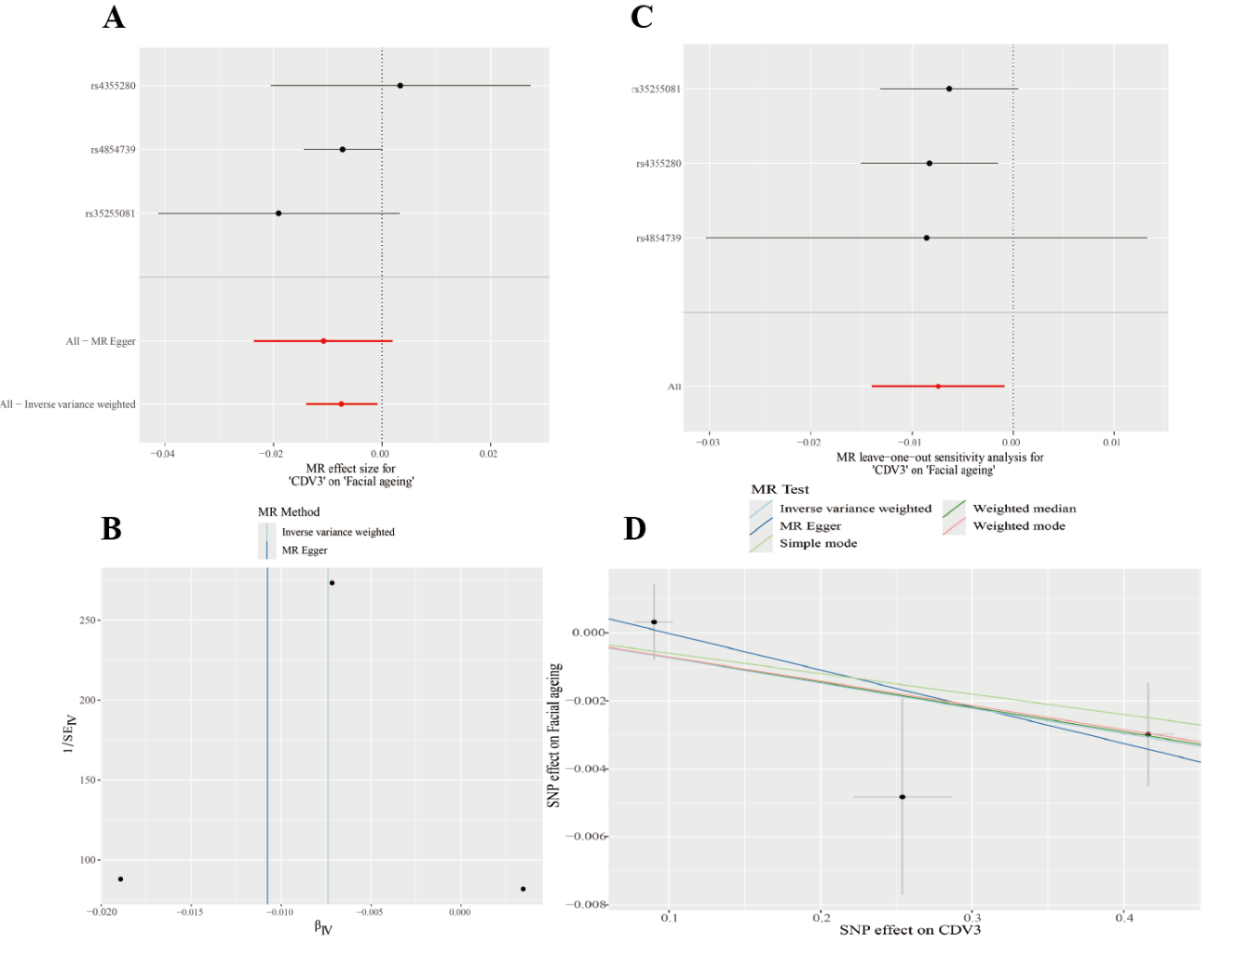
**

**Supplementary Figure 2：**Association Between SG and CDV3 Estimated by the MR. **(A)** Forest plot of CDV3 for each 1 SD increase of SG risk. **(B)** The funnel plot showed no asymmetry **(C)**There was no substantial change of IVW causal estimate after removing any of the instrumental SNPs. **(D)** Scatter plot showing the effect of genetic instruments on SG risk against their effect on CDV3.

**
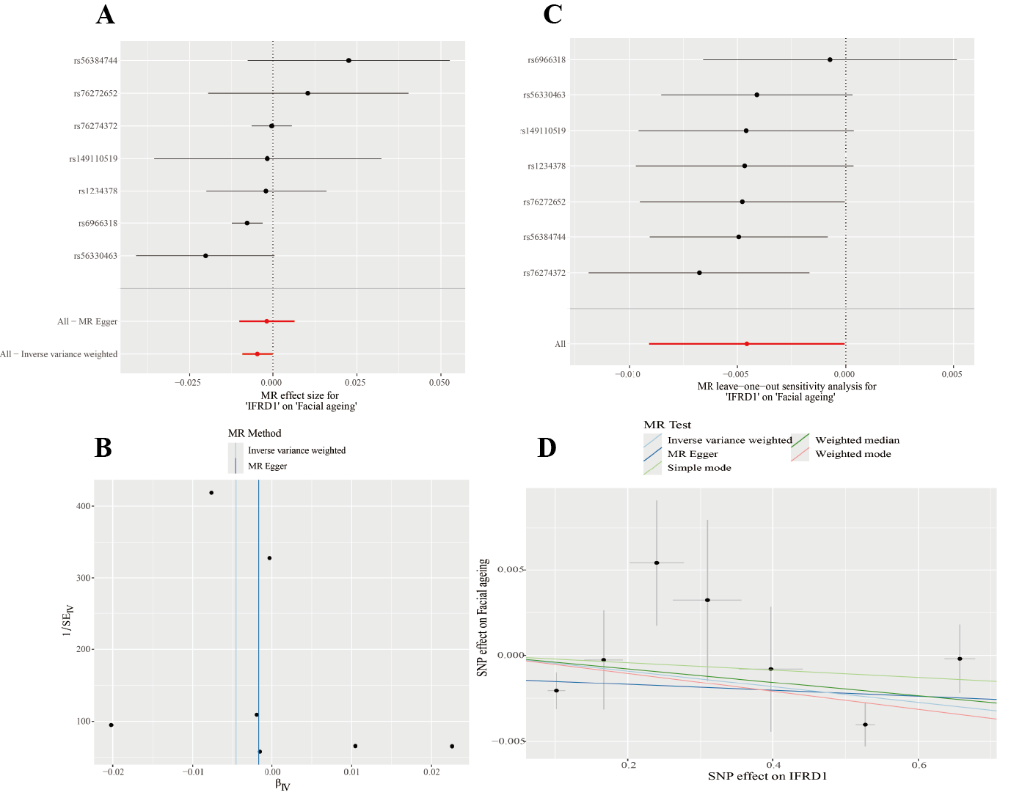
**

**Supplementary Figure 3：**Association Between SG and IFRD1 Estimated by the MR. **(A)** Forest plot of IFRD1 for each 1 SD increase of SG risk. **(B)** The funnel plot showed no asymmetry **(C)**There was no substantial change of IVW causal estimate after removing any of the instrumental SNPs. **(D)** Scatter plot showing the effect of genetic instruments on SG risk against their effect on IFRD1.

**
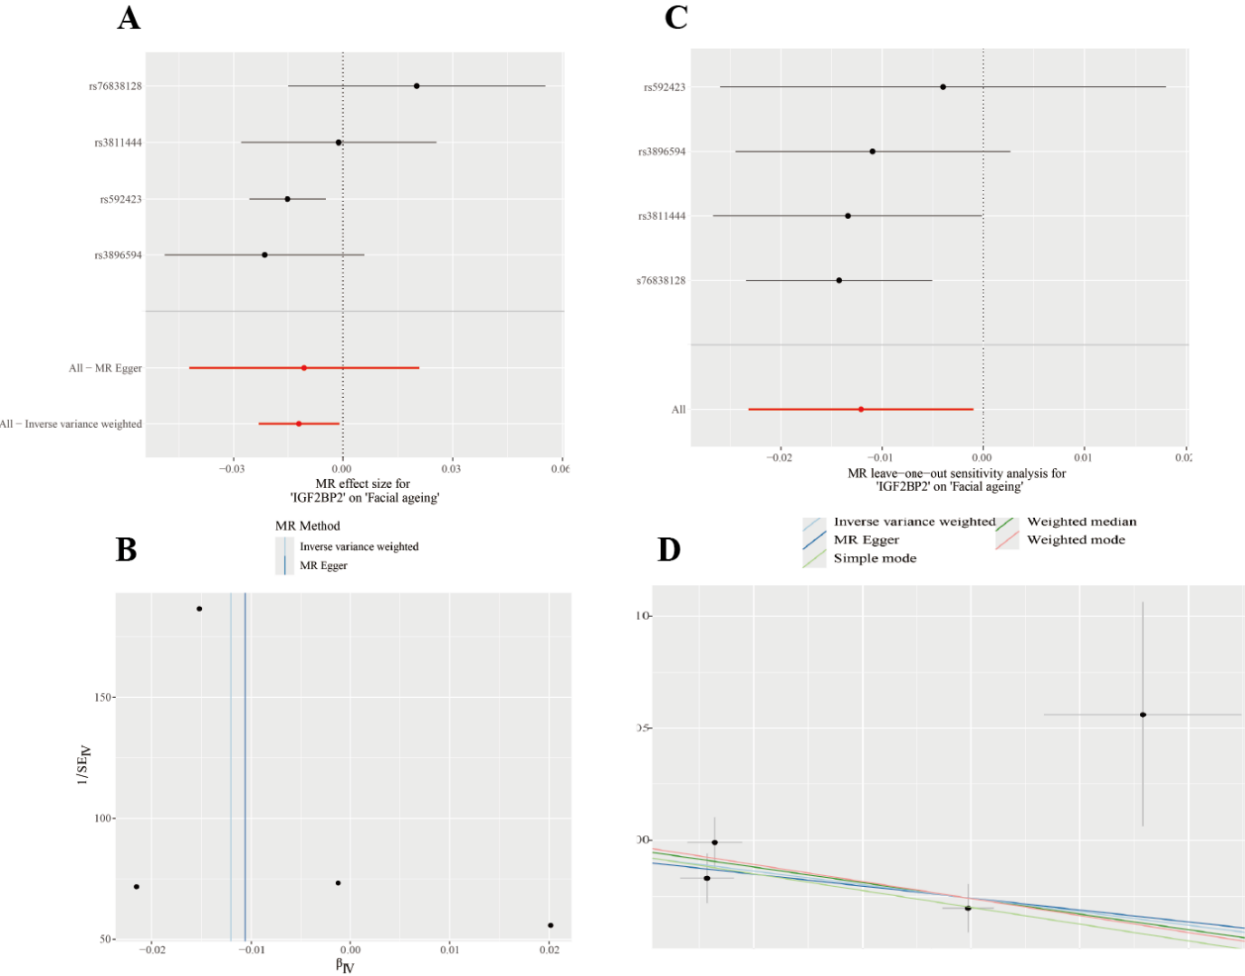
**

**Supplementary Figure 4：**Association Between SG and IGF2BP2 Estimated by the MR. **(A)** Forest plot of IGF2BP2 for each 1 SD increase of SG risk. **(B)** The funnel plot showed no asymmetry **(C)**There was no substantial change of IVW causal estimate after removing any of the instrumental SNPs. **(D)** Scatter plot showing the effect of genetic instruments on SG risk against their effect on IGF2BP2.

**
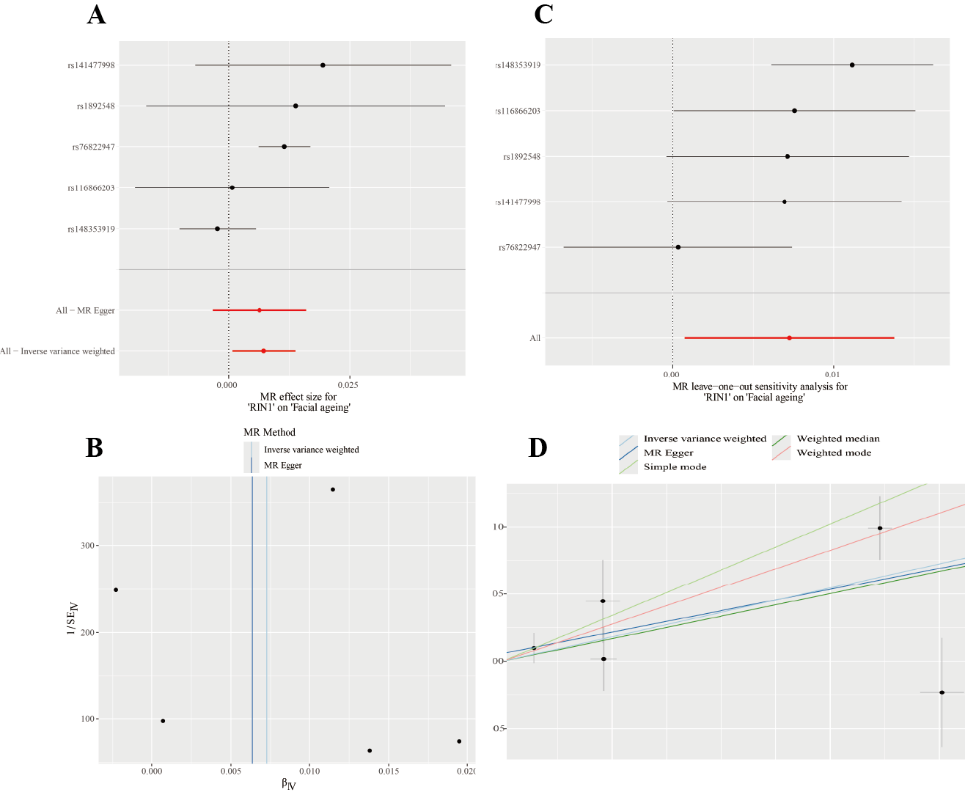
**

**Supplementary Figure 5：**Association Between SG and RIN1 Estimated by the MR. **(A)** Forest plot of RIN1 for each 1 SD increase of SG risk. **(B)** The funnel plot showed no asymmetry **(C)**There was no substantial change of IVW causal estimate after removing any of the instrumental SNPs. **(D)** Scatter plot showing the effect of genetic instruments on SG risk against their effect on RIN1.

**
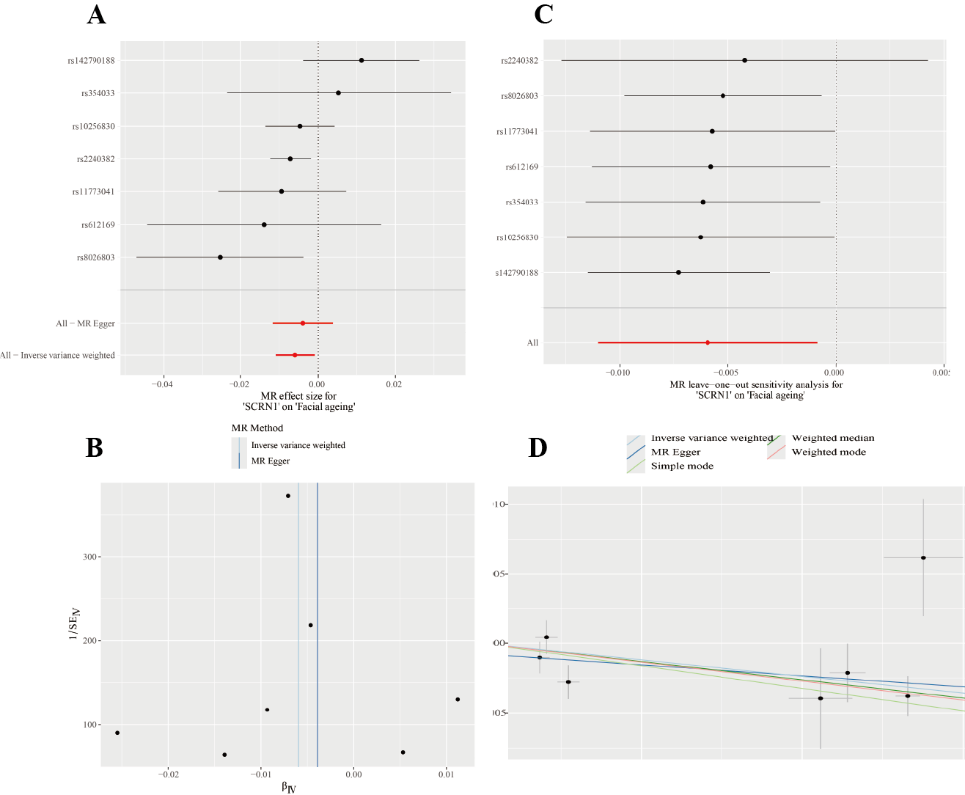
**

**Supplementary Figure 6：**Association Between SG and SCRN1 Estimated by the MR. **(A)** Forest plot of SCRN1 for each 1 SD increase of SG risk. **(B)** The funnel plot showed no asymmetry **(C)**There was no substantial change of IVW causal estimate after removing any of the instrumental SNPs. **(D)** Scatter plot showing the effect of genetic instruments on SG risk against their effect on SCRN1.

**
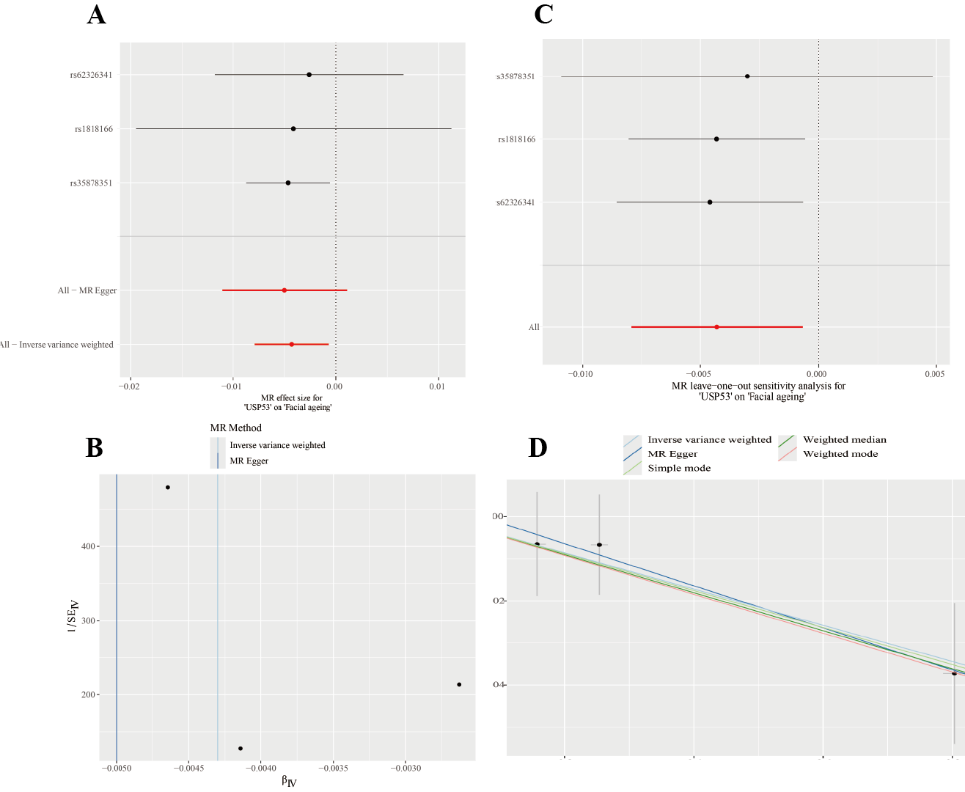
**

**Supplementary Figure 7：**Association Between SG and USP53 Estimated by the MR. **(A)** Forest plot of USP53 for each 1 SD increase of SG risk. **(B)** The funnel plot showed no asymmetry **(C)**There was no substantial change of IVW causal estimate after removing any of the instrumental SNPs. **(D)** Scatter plot showing the effect of genetic instruments on SG risk against their effect on USP53.

| **supplementary table 2 SNPs related to aging** | | | |
| --- | --- | --- | --- |
| **Number of SNPs** | **samplesize.outcome** | **pval.outcome** | **outcome and ID** |
| 17232 | 423999 | <0.05 | Facial ageing || id:ukb-b-2148 |
